# Supplementary material for: Metatranscriptomic Sequencing Reveals Host Species as an Important Factor Shaping the Mosquito Virome
Source: PubMed Central journal article supplement (PMC10101097; doi:10.1128/spectrum.04655-22), 2023-02-14
Supplement: spectrum.04655-22-s0001.pdf [file spectrum.04655-22-s0001.pdf]

## Supplemental Figures

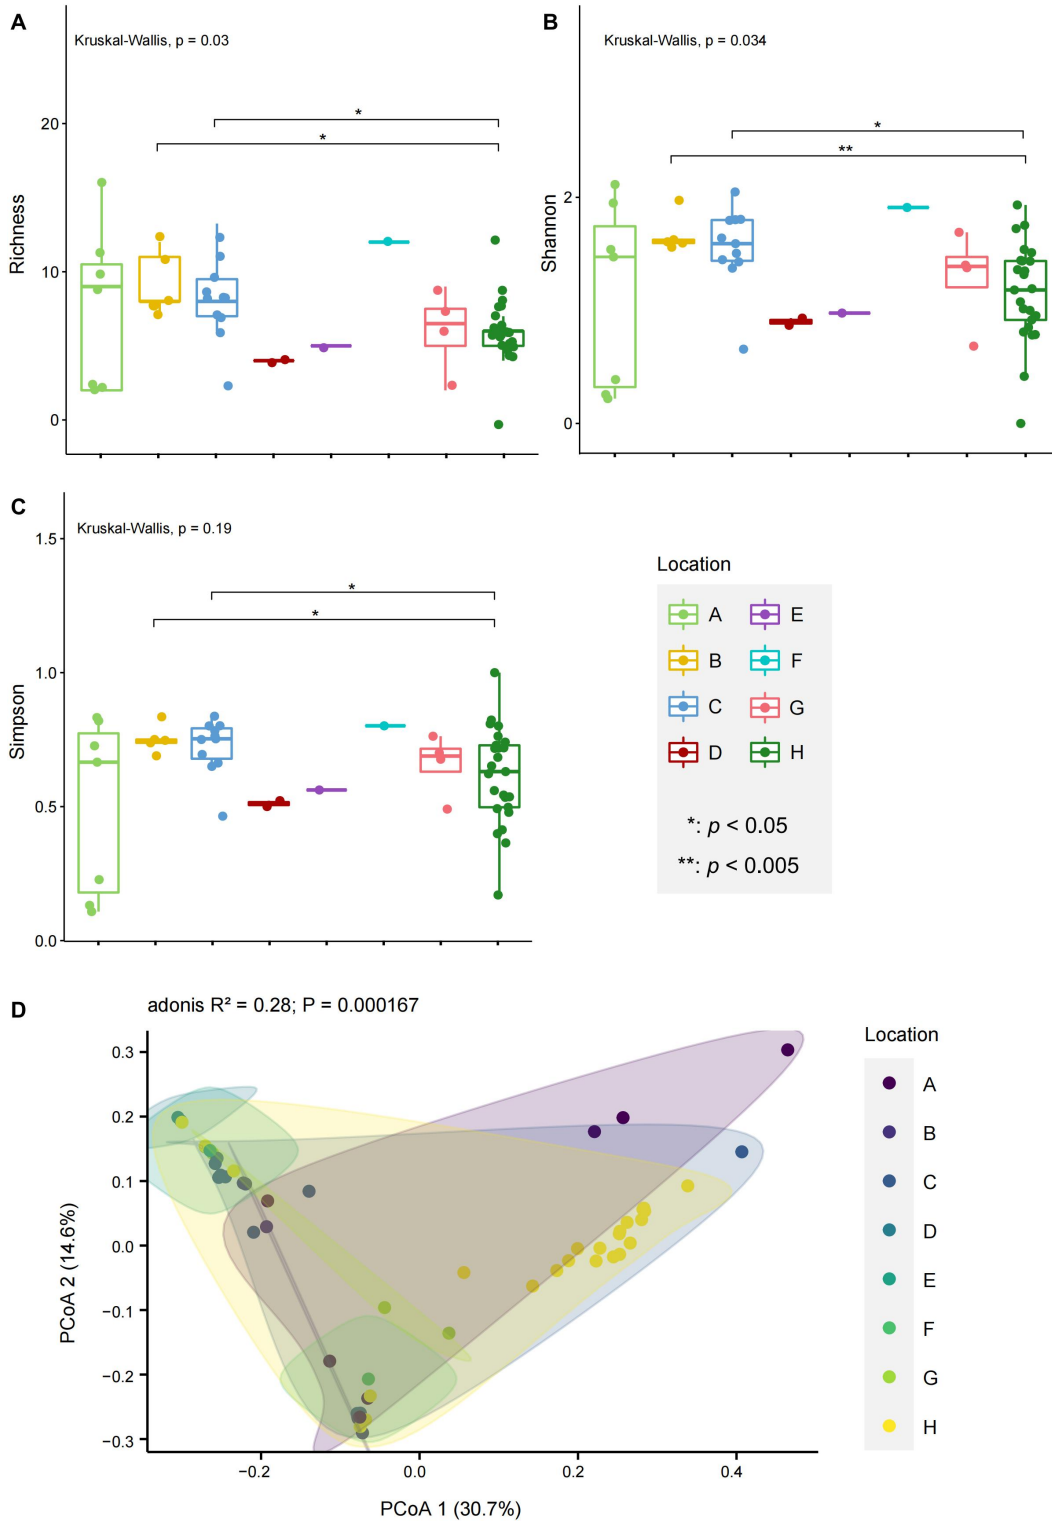

**Figure S1. Comparison of the viral diversity across different sampling locations. (A)** Virome richness, **(B)** Shannon index, **(C)** Simpson index, and **(D)** Beta diversity analysis of the viromic composition across different sampling locations.

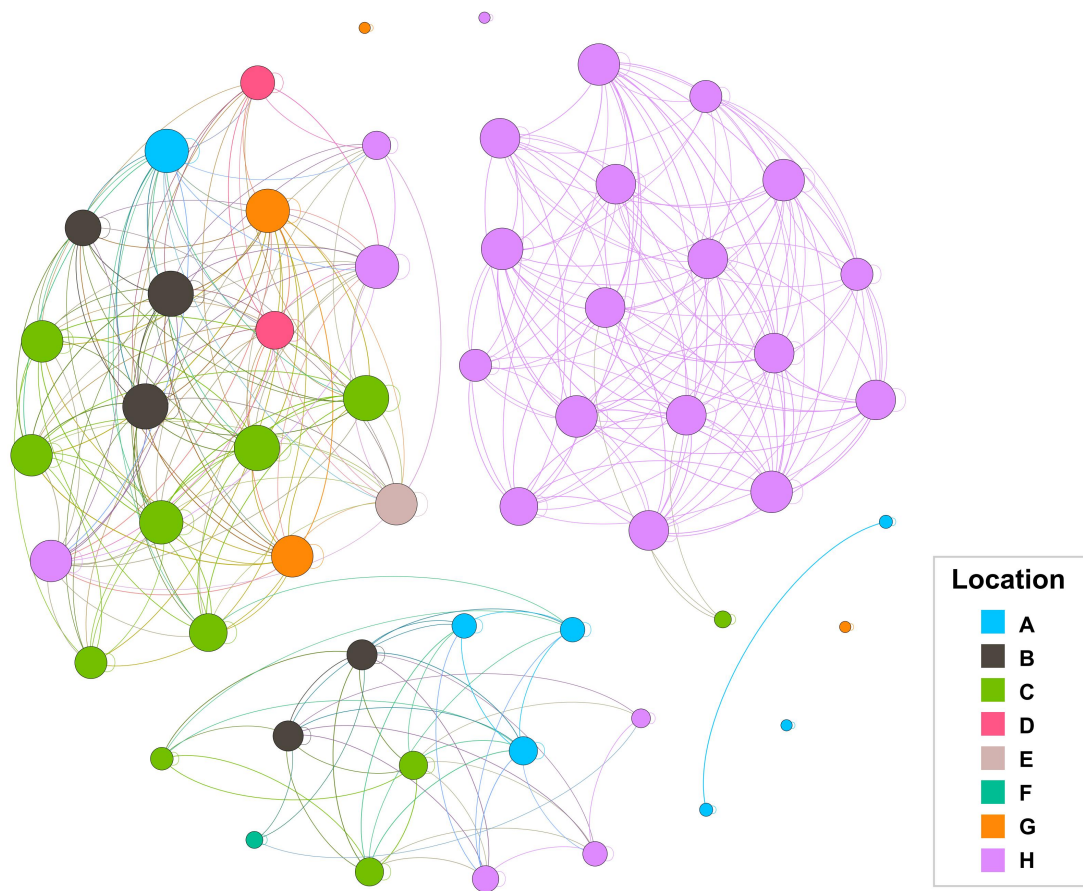

**Figure S2. Viral co-occurrence network of geographical locations.** The network was calculated using the relative abundance of each virus across libraries. Each node represents a library. Libraries with a Spearman's correlation greater than 0.6 ( $P < 0.05$ ) are connected by edges. The thickness of each edge is determined according to the correlation coefficients; the size of a node is determined by the degree (number of edge connections). The nodes were colored by sampling locations.
